## Highly efficient CRISPR-Cas9-mediated gene knockout in primary human B cells for functional genetic studies of Epstein-Barr virus infection

Ezgi Akidil<sup>1,2†</sup>, Manuel Albanese<sup>1,2,3†</sup>, Alexander Buschle<sup>1,2</sup>, Adrian Ruhle<sup>2,3</sup>, Oliver T. Keppler<sup>2,3</sup>, and Wolfgang Hammerschmidt<sup>1,2\*</sup>

<sup>1</sup>Research Unit Gene Vectors, Helmholtz Zentrum München, German Research Center for Environmental Health, Munich, Germany

<sup>2</sup>German Centre for Infection Research (DZIF), Partner site Munich, Germany

<sup>3</sup>Max von Pettenkofer Institute and Gene Center, Virology, National Reference Center for Retroviruses, Faculty of Medicine, LMU München, Munich, Germany.

†shared authorship

\*Corresponding author

Wolfgang Hammerschmidt

Marchioninistrasse 25

D-81377 Muenchen

Germany

Phone: +49-89-3187-1506

Fax: +49-89-3187-4225

E-mail: [hammerschmidt@helmholtz-muenchen.de](mailto:hammerschmidt@helmholtz-muenchen.de)

Keywords: B cells, CRISPR-Cas9, CD46, CDKN2A, p16<sup>INK4a</sup>, Epstein-Barr virus, EBNA3

## Abstract (words n=206)

Gene editing is now routine in all prokaryotic and metazoan cells but has not received much attention in immune cells when the CRISPR-Cas9 technology was introduced in the field of mammalian cell biology less than ten years ago. This versatile technology has been successfully adapted for gene modifications in human myeloid cells and T cells, among others, but applications to human primary B cells have been scarce and limited to activated B cells. This limitation has precluded conclusive studies into cell activation, differentiation or cell cycle control in this cell type. We report on highly efficient, simple and rapid genome engineering in primary resting human B cells using nucleofection of Cas9 ribonucleoprotein complexes. We provide proof-of-principle of gene editing in quiescent human B cells using two model genes: *CD46* and *CDKN2A*. The latter encodes the cell cycle regulator p16<sup>INK4a</sup> which is an important target of Epstein-Barr virus (EBV). Infection of B cells carrying a knockout of *CDKN2A* with wildtype and EBNA3 oncoprotein mutant strains of EBV allowed us to conclude that EBNA3C controls *CDKN2A*, the only barrier to B cell proliferation in EBV infected cells. Together, this approach enables efficient targeting of specific gene loci in quiescent human B cells supporting basic research as well as immunotherapeutic strategies.

## Author summary (words n=148)

Human hematopoietic stem cells and their derivatives of the myeloid and lymphoid lineages are important targets for gene correction or modifications using the CRISPR-Cas9 technology. Among others, this approach can support site-specific insertion of chimeric antigen receptors (CARs) or T cell receptors (TCRs) into primary T cells. Their subsequent adoptive transfer to patient donors is a promising immunotherapeutic concept that may control chronic infection or certain types of cancer. Human B cells have a similar potential but, in contrast to T cells, they are very sensitive, difficult to handle, and short-lived *ex vivo* precluding their genetic modification. Here, we provide means to manipulate primary human B cells genetically using *in vitro* assembled Cas9 ribonucleoprotein complexes and electroporation for their delivery. Our study demonstrates near-to-complete loss of a model target gene and provides examples to evaluate a cellular gene with a critical role during infection with Epstein-Barr virus (EBV).

## Introduction

The CRISPR-Cas9 technology has developed into an essential tool for gene editing and genome manipulation in many eukaryotic cell types (Hsu et al., 2014). This versatile system has been successfully applied to various mammalian cells and cell lines, but its application in certain primary human cells is far from routine. The technology has its limits when it comes to studying the biology of cells that cannot be easily maintained in culture *ex vivo* such as lymphocytes and other immune cells.

Early studies that applied CRISPR-Cas9 mediated gene editing in primary human T cells resulted in low targeting efficiencies and cellular toxicity (Mandal et al., 2014; Wang et al., 2014) probably due to the delivery of the Cas9 encoding plasmid DNA together with the two indispensable RNAs to assemble a functional CRISPR-Cas9 complex in the cells. *In vitro* assembly of purified bacterial Cas9 nuclease with synthetic CRISPR RNA (crRNA) and trans-

activating CRISPR RNA (tracrRNA) followed by nucleofection of the ribonucleoprotein (RNP) complex directly into cells was a major breakthrough in the T cell field (Hendel et al., 2015; Schumann et al., 2015). The highly efficient knockout of a target gene in primary human T cells proved that the RNP-based CRISPR-Cas9 technology can be applied to develop T cell based immunotherapies and suggested that it might be adaptable to other primary cell types (Seki and Rutz, 2018).

In contrast to T cells, primary B cells from humans thus far have received little attention in the field of efficient gene manipulation even though they are involved in numerous biological processes, autoimmune and infectious diseases. Until now, several studies using the CRISPR-Cas9 technology have focused on mouse B cells or immortalized human B cell lines latently infected with Epstein-Barr virus (EBV) (Cheong et al., 2016). Although high-efficiency gene knockouts in B cells have been achieved in these established models, there clearly remains the need to edit the genome of resting primary human B cells. Along these lines, two independent groups introduced RNP complexes into human B cells that had been pre-activated with a cocktail of cytokines (Hung et al., 2018; Wu et al., 2018). Results from both studies suggested that the efficiency of gene editing correlated with the level of B cell stimulation prior to nucleofection of the RNP complexes.

It is widely accepted that resting primary human B cells are refractory to genetic manipulation. Transfection of DNA is extremely inefficient (Kempkes et al., 1995a and unpublished data) and gene vectors based on retroviruses, lentiviruses or adenoviruses reach transduction rates of <1 % in these cells even when we followed published protocols (Funke et al., 2008; Funke et al., 2009). This refractory state is probably due to the cells' very reduced transcriptional activity, unknown restrictions that prevent efficient viral transduction, and the cells' rapid apoptosis within a couple of hours upon cultivation *in vitro* (Pich et al., 2019). In addition, guide RNA (gRNA) directed Cas9 endonuclease induces double stranded breaks (DSBs) at the target sites that may cause a potentially fatal DNA damage response (DDR) in B cells. DSBs might be yet another problem, because it is uncertain whether endogenous DNA repair mechanisms are active in resting cells to mend DSBs adequately. To our knowledge, cellular repair functions of damaged DNA have not been studied in primary human B cells.

In contrast to other viruses, Epstein-Barr virus and its vector derivatives are very proficient reaching high infection and transduction rates in resting primary B cells (Hellebrand et al., 2006). The lack of efficient gene editing has been a major roadblock for studies into human B cell biology and in particular for research on EBV. While large panels of EBV mutant viruses are readily available, studies into genetic variants of EBV's genuine human target cells, mature B cells, have not been possible before. Here, we report on highly efficient genome engineering in primary human B cells using the CRISPR-Cas9 technology. *In vitro* assembled RNPs can be delivered to primary resting human B cells by nucleofection followed by EBV infection to study virus biology and maintain the cells long-term.

Our manuscript demonstrates gene editing of the *CD46* locus reaching efficiencies of 85 % and beyond even when the primary human B cells were left uninfected. Studies into the kinetics of DSBs in these cells revealed that Cas9 introduced DSBs very rapidly at the *CD46* locus in the majority of cells within hours after nucleofection. Next generation sequencing of

CD46 mRNAs metabolically labeled with 4-thiouridine (4sU) documented gene editing and locus repair within 24h after nucleofection indicating the rapid clearance and active transcription of the edited gene locus.

For a functional proof-of-principle, we targeted an EBV relevant cellular gene, *CDKN2A*, which encodes p16<sup>INK4a</sup>, the CDK4 kinase and cell cycle inhibitor. Our findings confirmed a previous report (Skalska et al., 2013) documenting that p16<sup>INK4a</sup> is an important target of the viral EBNA3C repressor protein and the only barrier to EBV-induced B cell proliferation. In a counterexample, our experiments did not recapitulate the function of two viral transcriptional repressors, EBNA3A and EBNA3C, which were reported to block terminal differentiation of mature B cells into plasmablasts or plasma cells (Styles et al., 2017).

## Results

### CRISPR-Cas9 efficiently targets the locus of the cell surface protein CD46 in primary human B cells

We aimed at testing the functional knockout of genes in primary human B cells applying the CRISPR-Cas9 technology. Towards this end, we designed Cas9-gRNA ribonucleoprotein complexes to target exon 2 of the *CD46* gene. This gene encodes a cell surface protein present on almost all cells, which is also robustly expressed in mature human B cells (Mrozek-Gorska et al., 2019 and <http://ebv-b.helmholtz-muenchen.de/>). This cell surface protein can protect cells from complement attack, it modulates adaptive immune responses in T cells and is a receptor exploited by certain bacteria and viruses. Despite these diverse functions, the survival of human B cells does not depend on its expression even *in vivo* (Fuchs et al., 2009).

The recombinant *Streptococcus pyogenes* Cas9 nuclease was assembled *in vitro* using a two-component gRNA protocol with tracrRNA and crRNA. RNP complexes assembled with two different gRNAs (gRNA1, gRNA2) were used individually or in combination. These gRNAs target two sites in the second exon of the gene locus that are 98 bp apart. As shown in **Figure 1A**, the two CD46-Cas9 RNP complexes were nucleofected into primary human B cells purified from human adenoid biopsies (as described in Materials and Methods). Since primary human B cells rapidly undergo apoptosis when cultured *ex vivo* in the absence of stimulatory factors, we infected the cells with wild-type (WT) EBV at an optimal multiplicity of infection (Pich et al., 2019) one hour after nucleofection. EBV infection rescues the *ex vivo* cultivated B cells from cell death and reprograms them to emerge as proliferating lymphoblastoid cell lines (Mrozek-Gorska et al., 2019). The efficiency of gene editing was investigated both at the level of nucleotide sequence and surface protein expression one week post nucleofection (**Fig. 1B**) using the two specific gRNAs either individually or combined. When the CD46-Cas9 RNP complexes were used individually knockout efficiencies of about 60 % were observed (**Fig. 1B**). When both CD46-Cas9 RNP complexes were co-nucleofected knockout efficiencies regularly reached 85 % and more both at the level of DNA editing and loss of CD46 surface expression (**Fig. 1B, C, Supplementary Fig. S1A**). The viability of nucleofected B cells typically ranged between 70 and 80 % and *CD46* knockout efficiencies showed little donor variations. The nucleofection procedure did not detectably interfere with subsequent EBV infection or outgrowth of lymphoblastoid cells.

### The kinetics of induced DNA breaks and their repair in non-infected and EBV infected primary B cells

To characterize the Cas9 mediated DNA cleavage and repair at the *CD46* locus further, we defined three different states of its exon 2. The 'intact' state is the original, unaltered DNA sequence that the CD46-Cas9 RNP complex targets. The 'indel' state characterizes the double-stranded DNA break (DSB) after its repair by the non-homologous end joining (NHEJ) pathway, which often introduces small insertions or deletions at the repaired site. Lastly, DNA repair may also lead to the 'deleted' state when a DNA fragment of about 98

nucleotides is lost upon the concomitant repair of two DSBs joining the distant DNA ends in exon 2 of the *CD46* locus.

To identify the kinetics of the different states, we isolated genomic cellular DNA from non-infected primary B cells at various time points after nucleofection. At each time point, we PCR-amplified a region that encompasses exon 2 of *CD46* with the two gRNAs target sites. To study the 'indel' and 'deleted' states, we set out to determine the activity of the repair machinery by measuring the accumulation of indels via next-generation sequencing of the PCR products. We achieved more than 70 % indel frequency in primary human B cells 16 h after nucleofection and up to 85 % 72h after nucleofection, before the non-infected residual B cells rapidly underwent apoptosis (**Fig. 2A**). We also analyzed the PCR products on agarose gels and found a DNA fragment of approximately 180 bp in size already 16 hours after nucleofection indicative of the deleted state (**Supplementary Fig. S1B**). Together, these observations suggested a substantial DSB activity followed by an efficient DNA repair that caused indels and deletions in the majority of non-infected primary B cells within hours after nucleofection.

Next, we studied the kinetics of DSB and DNA repair in EBV infected cells in smaller increments. The results showed a constant increase of knockout efficiencies that reached 60 % 24 hours after nucleofection (**Fig. 2B**). A couple of days later, knockout efficiencies plateaued at about 85 %. In parallel, the loss of CD46 surface protein was studied by flow cytometry over time (**Fig. 2C**). A small fraction of CD46 negative cells, about 10 %, became detectable as early as 24 h after nucleofection. This fraction steadily increased to more than 85 % on day 8, consistent with a moderate protein turnover of this surface receptor after the genetic knockout of *CD46*.

These results led us to conclude that Cas9 rapidly locates to its specific target site in resting primary human B cells and introduces DSBs with high efficiency. The endogenous DNA repair mechanisms are active in these primary cells independent of EBV-induced B cell activation (**Fig. 2A**). Considerable fractions of DSBs are repaired already 16 hours after nucleofection as indicated by the deleted gene locus and the appearance of indels. The *CD46* knockout efficiency exceeded 85 % when quantified at the protein level by flow cytometry one week after nucleofection which is in line with our genomic analyses.

### **Nucleofection of the *CD46*-Cas9 RNP complex does not alter the overall B cells transcriptome**

It has been reported that Cas9 remains attached to DNA ends after cleavage *in vitro* (Sternberg et al., 2014). This roadblock together with a severed template will severely compromise transcription. In addition, the processes of nucleofection, DSBs induced by Cas9 and their repair might induce cellular stress that could also affect the transcriptome of the cells. To investigate possible adverse effects and to study global transcription as well as nascent *CD46* transcripts we employed metabolic labeling of newly synthesized RNA with 4-thiouridine (4sU) (**Fig. 2D**).

Isolated primary human B cells from three donors were nucleofected with the two *CD46*-Cas9 RNP complexes and infected with EBV one hour later. 23 hours after nucleofection

newly transcribed RNAs were metabolically labeled with 4sU for 60 minutes. Non-nucleofected (WT) but equally EBV infected and 4sU labeled cells served as controls. The labeled RNA was thiol-specifically biotinylated and separated from unlabeled, preexisting RNA. After validation and quantification of the labeled and enriched RNAs cDNA libraries were established to perform transcriptome sequencing. The overall RNA yield was very low but a thorough quality control after RNA extraction and library preparation confirmed the high quality of all six libraries.

The transcriptomes of CD46-Cas9 and WT B cell samples were analyzed and the comparison was visualized in an MA plot (**Fig. 2E**). After normalization 182 transcribed genes were found to be significantly regulated in this comparison (**Supplementary Table S3**). In nucleofected cells transcription at the *CD46* locus was reduced by a factor of 0.73 as compared to control cells, but the locus was clearly transcribed already 24 hours after CD46-Cas9 RNP complex nucleofection and was not blocked by, e.g., the cellular DNA repair machinery (**Supplementary Fig. S2**). In the MA plot we also highlighted transcripts of genes involved in the different pathways of DNA repair. No clear trend emerged from this analysis suggesting that nucleofection of CD46-Cas9 RNP complexes has no major impact on the transcriptome of human B cells. Gene ontology (GO) and gene set enrichment analysis (GSEA) analyses using Webgestalt (<http://www.webgestalt.org/>) provided lists of gene sets that were differentially regulated such as ‘nucleosome’ and ‘DNA packaging complex’ among others that seemed to be less conclusive to us.

Using the transcriptomic data of the *CD46* gene we analyzed the occurrence of mutations in the RNA of exon 2. Reads were inspected using the IGV browser and were assigned to three different groups: reads with unmodified exon 2 sequences, reads with 98 nucleotide deletions (Deletion) and reads with base changes or small deletions (Indels) (**Fig. 2F**). All reads from untreated (WT) B cell samples were identical to the reference sequence, whereas only 47.8 % of the reads in CD46-Cas9 nucleofected RNA samples were unaltered. 17.6 % of the reads in these RNA libraries showed mutations whereas the remaining 34.6 % documented the deletion of about 98 nucleotides as expected 24 h after nucleofection (**Fig. 2F**).

We had an even closer look at exon 2 of the transcribed *CD46* gene and its read profiles in non-nucleofected, untreated cells and in cells 24 hours after CD46-Cas9 RNP complex nucleofection (**Supplementary Figures S2, lower panel, S3A**). Apparently, the overall read coverage of exon 2 RNA was reduced to about one third in nucleofected cells compared with RNA data from non-nucleofected B cell samples. The substantial differences in reads were specific of exon 2 of *CD46*, the target sites of the two gRNAs whereas exons of other transcripts of equal length (189 nucleotides) did not show similar differences (**Supplementary Figure S3B-E**). Similarly, profiles of the last exon of *CD46* RNA compared with the last exons of other transcripts were comparable (**Supplementary Figure S3, lower row panels**).

From these data we can conclude that Cas9 nucleofection and DNA cleavage have no global effect on ongoing cellular transcription. The experiment documents that more than 50 % of exon 2 mRNA transcripts of *CD46* contain indels or are deleted (**Fig. 2F**) indicating that

cleavage and repair of template DNA are already completed and transcription of the edited gene has resumed and is functional 24 hours post nucleofection.

### **EBNA3C controls *CDKN2A*, a barrier to B cell proliferation**

Next, we explored whether editing of a gene in primary human B cells with well-established functions during EBV infection would result in a phenotype. We targeted *CDKN2A*, which encodes the p16<sup>INK4a</sup> protein, a CDK4 inhibitor that controls cell cycle G1 progression. This gene is often lost or mutated in various tumor types acting as an important tumor suppressor gene. The work by Martin Allday's group suggested that EBNA3C, a transcriptional repressor and latent EBV gene induces the epigenetic silencing of *CDKN2A* in latently infected lymphoblastoid cell lines (Skalska et al., 2013). Repression of *CDKN2A* was reported to be a prerequisite to support cell proliferation long-term as shown in lymphoblastoid B cell lines infected with an EBV derivative with a conditional EBNA3C allele (Skalska et al., 2013). A single infection experiment with primary B cells from an individual with a genetic lesion that prevents expression of functional p16<sup>INK4a</sup> is the only direct evidence supporting this claim in a physiological context (Skalska et al., 2013).

We sought to validate the role of *CDKN2A* in EBV infection using our CRISPR-Cas9 approach by inactivating this gene in primary human B cells from different donors. We designed a gRNA that targets exon1 $\alpha$  of the *CDKN2A* locus. As shown schematically in **Figure 3A** Cas9 introduced knockouts in this exon will cause frame shift mutations affecting the translation of p16<sup>INK4a</sup>. To this end, control (WT) and nucleofected (p16 KO) cells were infected with the WT (6008) EBV strain or the  $\Delta$ EBNA3C (6123) mutant EBV (Pich et al., 2019) to establish four different lymphoblastoid cell lines (LCLs) from each donor. After one week, the *CDKN2A* gene showed a knockout efficiency of about 60 to 80 % as expected from a single DSB that occurred in all cells (**Supplementary Fig. S4**).

Next, we wanted to study the biological consequences of the *CDKN2A* knockout. WT primary B cells and p16 KO cells were mixed such that the latter comprised 10 to 20 % of the total population, only, at the start of the experiments. We infected these mixed cell populations with either the WT EBV strain or the  $\Delta$ EBNA3C mutant EBV and cultivated the infected cells for up to 10 weeks. Occasionally, cells were sampled and their cellular DNAs were analyzed for *CDKN2A* knockout frequencies by next generation sequencing. As shown in **Figure 3B** and **Supplementary Figure S5A**, cells infected with the WT EBV strain showed a low fraction of inactivated *CDKN2A* genes in the population of cells during the course of the experiments. In contrast, cells infected with the  $\Delta$ EBNA3C mutant EBV showed a slow but gradual increase of *CDKN2A* indel frequencies that reached and exceeded 80 % in some experiments (**Fig. 3B**, **Supplementary Fig. S5A**). This observation documented a selection of *CDKN2A*-negative cells over time, when the cells were initially infected with an  $\Delta$ EBNA3C mutant EBV. In the absence of EBNA3C, cells expressing p16<sup>INK4a</sup> are lost because they enter a G1 block and thus cease to proliferate as suggested previously (for a recent review see Styles et al., 2018). On the contrary, cells that lack p16<sup>INK4a</sup> and are infected with the  $\Delta$ EBNA3C mutant EBV have a survival advantage and continue to proliferate even in the absence of the viral transcriptional repressor EBNA3C (**Fig. 3B** and **Supplementary Fig. S5A**), which leads to their enrichment in the mixed cell population.



We also observed the proliferation of the four different cell cultures by simply tracking their cellular expansion. We started with  $2 \times 10^6$  primary B cells infected with the WT EBV strain or the  $\Delta$ EBNA3C mutant EBV in a single well of a 48-well plate and continued to expand the cultures gradually to a final volume of about 100 ml in T175 cell culture flasks. WT EBV infected primary human B cells developed to LCLs irrespective of their p16<sup>INK4a</sup> status and reached the final culture volume about 5 to 7 weeks after the start of the experiments (**Fig. 3C, left panel, Supplementary Fig. S5B**).  $\Delta$ EBNA3C mutant EBV infected B cells could be expanded similarly until about 5 to 6 weeks p.i., when p16<sup>INK4a</sup> positive B cells ceased to proliferate and eventually died (**Fig. 3C, right panel, Supplementary Fig. S5B**). In contrast, p16<sup>INK4a</sup> negative B cells infected with the  $\Delta$ EBNA3C mutant EBV strain continued to proliferate beyond this time point.

Together, these experiments with primary B cells confirmed that EBNA3C is essential for the repression of *CDKN2A*, a finding which is in line with reports of the Allday group. All results are consistent with p16<sup>INK4a</sup> being the functional barrier to EBV-driven proliferation of LCLs. EBNA3C plays a central function to restrain transcription of p16<sup>INK4a</sup> in these cells as suggested previously (Maruo et al., 2006; Skalska et al., 2010; Styles et al., 2018).

#### **p16<sup>INK4a</sup> negative B cells infected with an EBV strain devoid of EBNA3A and C do not readily differentiate into the plasma cell lineage**

p16<sup>INK4a</sup> is an obstacle to establish EBNA3C deficient LCLs, whereas its cousin, EBNA3A is dispensable (Kempkes et al., 1995b; Allday et al., 2015). Both viral proteins have been implicated in blocking B cell differentiation towards plasmablast and plasma cells (Styles et al., 2017), because they can act as epigenetic repressors of several cellular loci other than *CDKN2A* such as *CDKN2C* and *PRDM1* encoding p18<sup>INK4c</sup> and BLIMP-1, respectively, and thus prevent terminal differentiation of lymphoblastoid B cells (Styles et al., 2017). Using our p16<sup>INK4a</sup> knockout strategy, we revisited this finding with the aim to obtain human plasma cells in large quantities by removing the p16<sup>INK4a</sup>-mediated block of cellular proliferation. Towards this end we infected mature B cells with an  $\Delta$ EBNA3A/C (6331) double knockout EBV (Pich et al., 2019) after nucleofection with the *CDKN2A* specific Cas9 complex. We expanded the cell cultures and analyzed their differentiation status by flow cytometry to assess B cell phenotypes using diagnostic and paradigmatic cell surface markers (Robillard et al., 2014). B cells from the same donors infected with the WT EBV strain served as controls (**Supplementary Fig. S6A**).

The immunophenotypic characteristics of plasma cells include surface expression of CD138, elevated levels of CD38, a general marker of lymphocytic activation, and down-regulation of CD20 (Robillard et al., 2014). The multiple myeloma cell line RPMI-8226, which expresses high levels of CD138 and contains a typical small subpopulation of CD138<sup>high</sup> cells (**Supplementary Fig. S6C**), as reported previously (Itoua Maïga et al., 2014; Païno et al., 2014), served as positive control. Next, we prepared and infected primary B cells as shown in **Supplementary Figure S6A**, cultivated them for up to two months and evaluated their immunophenotypic surface pattern. We found that cells infected with the two viruses did not show substantially different levels of the three surface markers CD20, CD38 and CD138 (**Supplementary Fig. S6B**). Even though  $\Delta$ EBNA3A/C mutant EBV infected cells had a trend towards lower levels of CD20 and higher levels of CD38 and CD138 as compared to WT EBV

infected cells, the levels were either not significantly different in case of CD20 and CD38 or very low in case of CD138 and without a discernable CD138<sup>high</sup> subpopulation as seen in RPMI-8226 cells (**Supplementary Fig. S6C**). Thus, our results appear to differ from previous work in which EBNA3A/C was found to block plasmablasts or plasma cell differentiation in LCLs.

## Discussion

In the current study, we established nucleofection-based delivery of Cas9-RNP complexes targeting *CD46* as a model gene with knockout efficiencies of up to 90 % in polyclonal, quiescent primary human B cells. Our readily applicable protocol, based on commercial reagents, allows genome-wide editing in primary resting human B cells.

Having worked with primary human B cells for decades, our laboratory has been unsuccessful in efficiently manipulating primary human B cells genetically very much in contrast to established B cell lines (Feederle et al., 2004; Maier et al., 2005). Using the CRISPR-Cas9 approach, primary human B cells from many donors tolerated RNP complex nucleofection with 70 to 80 % surviving cells, which is in stark contrast to transfections with DNA (Kempkes et al., 1995a). The ease and efficiency of genetic manipulation of primary B cells employing our protocol is a considerable step forward following pioneering work in primary human T cells (Hendel et al., 2015; Schumann et al., 2015; Hultquist et al., 2016; Seki and Rutz, 2018).

The high *CD46* knockout efficiency in primary human B cells likely resulted from combinatorial effects of two CD46-Cas9 RNP complexes and optimized nucleofection conditions. Conceivably, the specific gene locus and the design of the gRNAs may also strongly affect the outcome. We followed the scheme proposed by Clarke et al. (Clarke et al., 2018) and designed the upstream and downstream CD46-Cas9 RNP complexes to target the non-template and template orientations of the upper and lower DNA strands, respectively. Remarkably, this strategy also induced an efficient deletion together with frame shift mutations that led to a functional *CD46* knockout exceeding 85 % at the protein level (**Fig. 1B,C** and **Fig. 2A,B,C**). Similarly, when we targeted the *CDKN2A* gene with a single Cas9 RNP complex we regularly observed frame shift mutations in the order of 75 % (**Supplementary Fig. S4**) suggesting that nearly all cells in the B cell population were nucleofected initially.

Clearly, CRISPR-Cas9 mediated gene editing did not depend on the cells' activation state (**Fig. 2A**) indicating that EBV infection does not promote or enable gene editing but is only the driver of initial B cell survival and proliferation, which starts four days post infection (Pich et al., 2019)). Of note, a previous report concluded that activated human B cells are much more amenable to Cas9-mediated gene editing compared to resting B cells with only about 20 % knockout efficiency targeting a single gene during quiescence (Wu et al., 2018). Our data demonstrate that Cas9-mediated gene editing is fully functional and efficient in resting primary human B cells.

Both the overall efficiency and the kinetics of gene editing in resting B cells using our protocol were rather unexpected. Already 24 hours after Cas9 RNP complex nucleofection more than 50 % of newly transcribed CD46 mRNAs contained indels or showed the

characteristic deletion in exon 2 (**Fig. 2F**) indicating that DSB, their subsequent DNA repair and clearance of the templates to allow transcription can occur within hours following delivery of the Cas9 RNP complexes. The maximum knockout efficiency in the *CD46* locus typically exceeded 85 % one week after nucleofection, indicating that the CD46-Cas9 RNP complex remains active for several days in these cells, contrary to a previous report in which the authors used established human cells (Kim et al., 2014).

Focusing on genetic manipulation of *CDKN2A*, we employed our novel protocol and studied two related facets of EBV's complex biology in primary human B cells. EBNA3A and C, two related latent EBV genes, have been reported to act as mediators of epigenetic repression of several cellular gene loci. Among them is *CDKN2A*, which encodes the cell cycle inhibitor p16<sup>INK4a</sup> and which reportedly blocked proliferation of latently EBV-infected B cells in the absence of EBNA3C's repressive epigenetic functions (Maruo et al., 2006, Proc Natl Acad Sci U S A, 103, 19500-5; Skalska et al., 2010, PLoS Pathog, 6, e1000951; Styles et al., 2018, Pathogens). Our results after *CDKN2A* knockout shown in **Figure 3** corroborated this notion with primary B cells from six donors recapitulating a situation with B cells from a rare p16<sup>INK4a</sup> deficient individual (Skalska et al., 2013).

We went on and investigated another biological function suggested for EBNA3A and EBNA3C. A seminal paper by the Allday laboratory reported that EBV-infected lymphoblastoid B cells differentiated spontaneously and acquired a plasma cell-like phenotype in the absence of EBNA3A and C (Styles et al., 2017). The authors also discussed that inactive EBNA3A and C alleles may permit EBV infected B cells to differentiate further into plasmablasts and fully differentiated functional plasma cells, eventually, solely upon silencing of p16<sup>INK4a</sup>. Since authentic human antibodies have a promising translation potential, we tested this interesting hypothesis. It implies that *CDKN2A* indirectly precludes the differentiation of cycling pre-plasmablasts (Styles et al., 2017) because p16<sup>INK4a</sup> acts as a roadblock of the cell cycle preventing their proliferation and subsequent differentiation (Nutt et al., 2015). We genetically tested this scenario but found no clear evidence that EBNA3A and C together block differentiation of lymphoblasts to pre-plasmablasts, plasmablasts or plasma cells (**Supplementary Fig. S6**). This suggests that EBV-infected and activated B cells do not follow the default pathway to differentiate into plasma cells spontaneously *in vitro* for so far unknown reasons.

The CRISPR-Cas9 technology has gained much attention and one of the first phase I clinical trials assesses the feasibility of CRISPR-engineered T cells in patients with refractory cancer (Stadtmauer et al., 2020). B cell therapies have a similar potential but the obstacle to engineer primary human B cells has prevented translational progress with autologous B cells in patients. The here reported CRISPR-Cas9 protocol can be successfully applied to primary human B cells and will now also enable studies into the functional interactions between EBV and its primary host cells.

## **Materials and Methods**

### **Eukaryotic cell lines**

RPMI-8226 cells derived from a multiple myeloma biopsy (Matsuoka et al., 1967; Quentmeier et al., 2019) and Raji cells (Pulvertaft, 1964) were purchased from German Collection of Microorganisms and Cell Cultures GmbH (DSMZ), Braunschweig. RPMI-8226 cells, Raji cells and LCLs (derived from EBV infected B cells) were cultivated in RPMI-1640 medium supplemented with 8 % FCS, 100 µg/ml streptomycin, 100 U/ml penicillin, 1 mM sodium pyruvate, 100 nM sodium selenite, and 0.43 %  $\alpha$ -thioglycerols at 37 °C and 5 % CO<sub>2</sub>. HEK293 based EBV producer cell lines (Pich et al., 2019) were cultured in the same medium with 500 ng/ml puromycin.

### **Virus supernatant production and quantification**

To obtain virus stocks, three different HEK293 producer cell lines established in our lab (6008, 6331, 6123) (Pich et al., 2019) were transiently transfected with expression plasmids encoding BZLF1 (p509) and BALF4 (p2670) to induce EBV's lytic cycle as described previously (Neuhierl et al., 2002; Pich et al., 2019). Briefly, cells were seeded onto 13 cm dishes to reach 80 % confluency. The next day, the cells were transfected using 6 µg p509 and 6 µg p2670 plasmid DNAs (Neuhierl et al., 2002) mixed with 72 µl of a 1 mg/ml stock solution of polyethylenimine (#24765; Polysciences) in water (pH 7.0) in 2.4 ml plain RPMI1640 cell culture medium and incubated for 15 min. The mix was dropped onto HEK293 producer cell lines in fully supplemented cell culture medium without puromycin and the transfected cells were incubated for 3 days. Cell culture supernatants were collected and centrifuged for 8 min at 300 g and then at 1,200 g for 8 min. To titer the virus stocks,  $1 \times 10^5$  Raji cells (obtained from the Leibniz Institute DSMZ) were incubated with different volumes of virus stocks at 37 °C for 3 days. The percentages of GFP-positive cells were determined by flow cytometry using a BD FACS Canto instrument (BD Bioscience), and the linear regression equation was calculated as previously described (Steinbrück et al., 2015). The virus stocks were stored at 4 °C.

### **B cell isolation from adenoid tissue**

Primary B cells were isolated from adenoid biopsies of anonymous donors. The adenoid tissues were rinsed with PBS several times using a 100 µm cell strainer (Falcon), transferred to a sterile petri dish and mechanically chopped with two sterile scalpels and PBS. The cell suspension was filtered through a 100 µm strainer. This procedure was repeated several times to recover a maximum number of cells. The volume of the collected cells was increased to 30 ml with PBS. 0.5 ml defibrinated sheep blood (Thermo Scientific Oxoid, catalog no. SR0051D) was added to deplete T cells in the next step. The cell suspension was underlayered with 15 ml Ficoll Hypaque and the samples were centrifuged at 500 g for 30 min. Cells were carefully collected from the interphase and transferred to a new 50 ml tube. The cell suspension was washed three times in a total volume of 50 ml PBS and centrifuged with decreasing sedimentation forces (450, 400 and 300 g) for 10 min each. The cell pellet was resuspended in pre-warmed complete cell culture medium supplemented with cyclosporin A.

## **Ethics statement**

Adenoid samples used in the experiments were leftovers from adenoidectomies performed at the Department of Otorhinolaryngology and Head and Neck Surgery, Klinikum der Universität München; these samples were transferred to our institution in fully anonymized form. The institutional review board (Ethikkommission) of the Klinikum der Universität München, Munich, Germany) approved this procedure (project no. 071-06-075-06).

## **Infection of primary human B cells with EBV**

Virus supernatants were incubated with primary B cell suspension at an optimal multiplicity of infection (MOI) of 0.1 'green Raji units' overnight as described (Steinbrück et al., 2015). The following day, the virus supernatant was replaced with fresh medium after centrifugation of the cell suspension at 300 g for 10 min.

## **Staining of B cell surface markers for flow cytometry**

B cells were collected at different time points after infection and stained with antibodies specific for the indicated cell surface markers; CD19 (eFluor450 conjugated, eBioscience, #48-0199-42, diluted 1:50), CD20 (PE-conjugated, BD, #556633, diluted 1:100), CD38 (PECy7-conjugated, eBioscience, #25-0389-42, diluted 1:300), CD138 (APC-conjugated, Invitrogen, #17-1389-42, diluted 1:50) and CD46 (APC-conjugated, Biolegend, #352405, diluted 1:50). For staining, the cells were washed with and resuspended in 50 µl FACS staining buffer (PBS, 0.5 % BSA, 2 mM EDTA). After adding the antibodies, samples were mixed and incubated at 4 °C in the dark for 20 min. Cells were washed with 1 ml of FACS staining buffer and resuspended in 200 µl FACS staining buffer. Flow cytometry data were collected on a FACS Canto II (BD) or FACS Fortessa (BD) instrument. The FACS data were analyzed with the FlowJo software (version 10.4).

## **Assembly of ribonucleoprotein (RNP) complexes**

Chemically synthesized tracrRNA and crRNAs were obtained from IDT and were dissolved in Nuclease-free Duplex Buffer (IDT) at 200 µM. 5 µl of crRNA and tracrRNA each were mixed 1:1 to reach a final concentration of 100 µM. To form the gRNA complex the mixture was incubated at 95 °C for 5 min in a pre-heated PCR cycler and slowly cooled down to room temperature by switching the instrument off. 6.5 µl of a 62 µM Cas9 V3 protein preparation (1081059; Integrated DNA Technologies) was added to 10 µl of the annealed gRNAs and the mix was diluted with PBS to a final volume of 50 µl. Prior to adding PBS, it was filtered (0.22 µm mesh size) and used at room temperature. The mixture was incubated at room temperature for 10 min to form RNPs at a final concentration of 8 µM Cas9. The gRNAs specific for the target gene were designed using the IDT web site. The sequences of the crRNAs are provided in **Supplementary Information Table S2**.

## **Nucleofection of RNP complexes into primary human B cells**

$2 \times 10^6$  freshly isolated primary B cells were washed in PBS and resuspended in 20 µl P3

Primary Cell Nucleofector Solution buffer prepared with Supplement 1 buffer (Lonza) according to the manufacturer's instructions (P3 Primary Cell 4D-Nucleofector X Kit S). Cells were mixed with 5  $\mu$ l of the RNP mixture by gently pipetting and were transferred to pre-cooled (4 °C) 16 well Nucleocuvette Strips (Lonza). Primary human B cells were nucleofected using the EH100 program of Lonza's protocol. 100  $\mu$ l prewarmed non-supplemented RPMI1640 medium was added to the cells, which were incubated for 15 min at 37 °C. The cells were transferred to a single well of a 24-well cluster plate and complete prewarmed cell culture medium containing 20 % FCS was added to a final volume of 220  $\mu$ l to allow cell recovery. The cells were incubated at 37 °C, 5 % CO<sub>2</sub> for 1 h before they were infected with EBV.

### **Knockout quantification with next generation sequencing**

Genomic DNA was isolated from  $0.5-1 \times 10^5$  cells after Ficoll Hypaque density gradient centrifugation. The cell suspension was underlayered with 5 ml Ficoll Hypaque in a 15 ml tube and the sample was centrifuged at 500 g for 30 min. Cells were carefully collected from interphase and transferred to a new 15 ml tube. The cell suspension was washed with PBS 2 times in a total volume of 15 ml (450, 400 g) for 10 min each. The last wash was performed in a total volume of 1 ml (300 g) for 10 min. The cells were resuspended in 20  $\mu$ l of lysis buffer (0.2 mg/ml proteinase K, 1 mM CaCl<sub>2</sub>, 3 mM MgCl<sub>2</sub>, 1 mM EDTA, 1 % Triton X 100, 10 mM Tris pH 7.5) supplemented with 20 ng/ml proteinase K. The reactions were incubated at 65 °C for 10 min and at 95 °C for 15 min in a PCR thermo cycler. In a two-step PCR barcoding scheme, first-level PCR reactions were performed using 5  $\mu$ l of the cell lysate in a final total volume of 25  $\mu$ l that included primers, dNTPs, reaction buffer, GC-enhancer buffer and 0.25  $\mu$ l of Q5® Hot Start High-Fidelity DNA Polymerase (NEB, Massachusetts, USA). Amplification was done after an initial phase of denaturation (95 °C, 5 min) in 32 cycles composed of 98 °C, 62 °C, and 72 °C for denaturation, annealing and elongation and for 20 sec, 30 sec, and 40 sec, respectively. After an analytical gel, 6  $\mu$ l were transferred to a second round of PCR amplification using barcode primers that were sample specific for subsequent DNA sequencing. The PCR reaction was run on a 1.5 % preparative agarose gel, size-separated and bands of the expected lengths were eluted and quantified using a Nanodrop spectrophotometer system (Thermo Fisher). Next generation sequencing was performed using a MiSeq benchtop sequencing system (Illumina). Data were obtained in FASTQ format and analyzed using the Outknocker 2.0 web tool (<http://www.outknocker.org/outknocker2.htm>) (Schmid-Burgk et al., 2014). Sequences of all primers are provided in **Supplementary Information Table S1**.

### **Metabolic labeling of newly transcribed RNA with 4sU and RNA isolation**

$2 \times 10^7$  primary human B cells were nucleofected with the CD46-Cas9 RNP complex as described in the section entitled 'Nucleofection of RNP complexes into primary human B cells. CD46-Cas9 B cell samples as well as the adjusted numbers of non-nucleofected B cell samples were infected with the wild-type EBV. Previously published 4sU protocols (Garibaldi et al., 2017) were adjusted to our protocol as follows. Newly transcribed RNAs were metabolically labeled with 4sU (Sigma Aldrich, T4506-25mg) by adding 4sU to the culture medium at a final concentration of 100-200  $\mu$ M and incubation at 37 °C for 1 hour. At the end of labeling, the cells were centrifuged and washed with cold PBS. For RNA extraction,

the cell pellet was homogenized in 1 ml of 4 °C cold Trizol reagent by vortexing and passing the lysate through a 25G needle 8-10 times. The samples were vigorously vortexed for 15 sec and incubated for 2-3 min at room temperature. The lysate was transferred into a prepared 5PRIME Phase Lock Gel – Heavy and Light (Quantabio) and centrifuged at 12,000 g for 15 min at 4 °C to separate RNA, DNA and proteins into different phases. The upper phase containing RNA was carefully transferred to a new sterile RNase-free tube and combined with an equal volume of isopropanol and 0.1 volume of 5 M NaCl. The mixture was incubated for 10 min at RT and precipitated RNA was collected at 12,000 g at 4 °C for 10 min. The pellet was washed with 1 ml of 80 % of ethanol and spun at 5,000 g for 5 min at 4 °C and air-dried for 2-3 min at room temperature. The pelleted RNA was rehydrated in 20-40 µl of RNase-free water.

To biotinylate the newly transcribed and 4sU labeled RNAs, 1 µg/µl of total RNA was incubated with biotin-HPDP (Pierce, 1 mg/ml) in biotinylation buffer (1 M Tris pH 7.4, 0.5 M EDTA) while agitating in the dark for at least 2 h. The identical volume of phenol-chloroform-isoamyl alcohol was mixed with the biotinylated RNA sample, which was later purified by using Phase Lock Gel Heavy Tubes. The upper RNA containing phase was precipitated by adding an equal volume of isopropanol and 0.1 vol of 5 M NaCl followed by incubation at room temperature for 10 min. The pellet was washed with 500 µl of 80 % of ethanol and centrifuged (20.00 g, 5 min, 4 °C). Biotinylated RNA was resuspended in 100 µl RNase-free water and final concentration of 1 µg/µl.

4sU-biotinylated RNA was separated from unlabeled RNA using streptavidin. RNA samples were denatured at 65 °C for 10 min followed by rapid cooling on ice for 5 min. RNA was incubated with 200 µl of µMACs Streptavidin Microbeads (Miltenyi) for 15 min at room temperature while agitating. The columns were placed in an OctoMACS Separator magnetic stand and were equilibrated with wash buffer (100 mM Tris-HCl pH 7.4, 10 mM EDTA, 1 M NaCl, 0.1 % Tween 20). RNA samples with beads were loaded onto the column to enrich for 4sU-biotinylated RNA molecules. The flow through with mostly unlabeled RNA was reloaded twice onto the column. The column was washed 2 times with 200 µl of pre-warmed (55 °C) wash buffer. The interactions between 4sU-biotinylated RNA and streptavidin beads were resolved by washing the column with 100 µl of 100 mM freshly prepared DTT in water. Elution steps were repeated with the addition of 100 µl of 100 mM DTT twice. Unlabeled and labeled RNA molecules were recovered by ethanol precipitation using 0.1 volume of 3 M NaOAc (pH 5.2) and 3 volumes of cold absolute ethanol. To recover labeled RNAs efficiently, 3 µl of glycogen (20 mg/ml, Thermo Fisher Scientific) was added prior to precipitation. The samples were incubated overnight at -20 °C. Precipitated RNAs were collected by centrifugation at 20,000 g for 20 min at 4 °C. The RNA pellet was rehydrated with an appropriate volume of RNase-free water and stored at -80 °C. Total RNA concentration and quality of the samples were determined using an Agilent 2100 Bioanalyzer (Agilent Technologies) prior to generating the libraries for next generation sequencing.

### **Library preparation and sequencing**

Library preparation and sequencing was performed at the Heinrich Pette Institute, Hamburg, Germany. After isolation of total RNA its integrity was analyzed with the RNA 6000 Pico Chip on an Agilent 2100 Bioanalyzer (Agilent Technologies). Prior to library generation, RNA was

subjected to DNase I digestion (Thermo Fisher Scientific) followed by RNeasy MinElute column clean up (Qiagen). RNA-Seq libraries were generated using the SMART-Seq v4 Ultra Low Input RNA Kit (Clontech Laboratories) according to the manufacturer's recommendations. cDNA final libraries were generated utilizing the Nextera XT DNA Library Preparation Kit (Illumina). Concentrations of the final libraries were measured with a Qubit 2.0 Fluorometer (Thermo Fisher Scientific) and fragment lengths distribution was analyzed with the DNA High Sensitivity Chip on an Agilent 2100 Bioanalyzer (Agilent Technologies). All samples were normalized to 2 nM and pooled to become equimolar. The library pool was sequenced on the NextSeq500 (Illumina) with 2x150 bp (paired end), with 15.7 to 18.6 mio reads per sample.

### **Bioinformatic analysis**

The FastQ-sequences were analyzed with MultiQC (v1.7) (Ewels et al., 2016) for quality issues and trimmed with Trimmomatic (0.39) (Bolger et al., 2014) for leading and trailing bases with a quality threshold of 20 each. The reads were mapped to the Human Genome 19 with Hisat2 (2.1.0) (Kim et al., 2015) and file format conversion and sorting was done with Samtools (1.10) (Li et al., 2009). Since the targeted exon 2 of CD46 comprises 189 nucleotides, other exons with the same number of nucleotides were identified for comparison. The data from the genes comprising exons of 189 nts were extracted with Samtools' view command, indexed with Samtools' index, and the coverage for each base was calculated with Samtools' depth -a -r. Both normalization and visualization were done in R (R Core Team, 2018). For normalization the samples were downsampled to the total number of mapped reads. The mean was applied to three independent replicates for visualization.

### **ACCESSION NUMBERS AND DATA AVAILABILITY**

RNA-seq NGS files are deposited on ArrayExpress (Kolesnikov et al., 2015) using the web-based submission tool Annotare 2.0 (<https://www.ebi.ac.uk/fg/annotare/login/>). The data files of interest can be downloaded via <https://www.ebi.ac.uk/arrayexpress/> using the following accession numbers:

RNA-seq: <https://www.ebi.ac.uk/arrayexpress/experiments/E-MTAB-9531>

### **Statistical Analysis**

All statistical analyses were performed using Prism v7.0 (GraphPad Software, San Diego, CA). Prior to test, graph kurtosis was analyzed to ensure normal or non-normal distribution. Based on the distribution analysis; Wilcoxon signed-rank test was used for comparisons between samples. Data are reported as mean and SEM.

### **Acknowledgements**

We would like to thank Dagmar Pich and Christine Goebel for taking care of cells occasionally. We thank Daniela Indenbirken and Adam Grundhoff, Heinrich Pette Institute Hamburg, for their support in establishing libraries from minute amounts of mRNA and



sequencing them. We thank Andreas Brachmann, Biozentrum Ludwig-Maximilians-Universität München, and Veit Hornung, Gene Center, Ludwig-Maximilians-Universität München, for support in running the PCR library samples on their MiSeq instruments. This work was financially supported by grants from the Deutsche Forschungsgemeinschaft (grant number SFB1064/TP A13), Deutsche Krebshilfe (grant number 70112875) and German Center for Infection Research (grant number 07.814) to W.H..

### **Author contributions**

EA performed all experiments. AB analyzed the RNA sequencing data and provided the corresponding plots. AR prepared all MiSeq samples for next generation sequencing. EA, MA, OTK, and WH designed the experiments and the scientific concept and wrote the manuscript.

### **Competing interest**

The authors declare no competing interests.

## References

- Allday, M.J., Q. Bazot, and R.E. White. 2015. The EBNA3 family: two oncoproteins and a tumour suppressor that are central to the biology of EBV in B cells. *Curr Top Microbiol Immunol.* 391:61-117. doi:10.1007/978-3-319-22834-1\_3.
- Bolger, A.M., M. Lohse, and B. Usadel. 2014. Trimmomatic: a flexible trimmer for Illumina sequence data. *Bioinformatics.* 30:2114-2120. doi:10.1093/bioinformatics/btu170.
- Cheong, T.C., M. Compagno, and R. Chiarle. 2016. Editing of mouse and human immunoglobulin genes by CRISPR-Cas9 system. *Nat Commun.* 7:10934. doi:10.1038/ncomms10934.
- Clarke, R., R. Heler, M.S. MacDougall, N.C. Yeo, A. Chavez, M. Regan, L. Hanakahi, G.M. Church, L.A. Marraffini, and B.J. Merrill. 2018. Enhanced bacterial immunity and mammalian genome editing via RNA-polymerase-mediated dislodging of Cas9 from double-strand DNA Breaks. *Mol Cell.* 71:42-55.e8. doi:10.1016/j.molcel.2018.06.005.
- Ewels, P., M. Magnusson, S. Lundin, and M. Källér. 2016. MultiQC: summarize analysis results for multiple tools and samples in a single report. *Bioinformatics.* 32:3047-3048. doi:10.1093/bioinformatics/btw354.
- Feederle, R., H.J. Delecluse, J.P. Rouault, A. Schepers, and W. Hammerschmidt. 2004. Efficient somatic gene targeting in the lymphoid human cell line DG75. *Gene.* 343:91-97. doi:10.1016/j.gene.2004.08.005.
- Fuchs, A., J.P. Atkinson, V. Fremeaux-Bacchi, and C. Kemper. 2009. CD46-induced human Treg enhance B-cell responses. *Eur J Immunol.* 39:3097-3109. doi:10.1002/eji.200939392.
- Funke, S., A. Maisner, M.D. Muhlebach, U. Koehl, M. Grez, R. Cattaneo, K. Cichutek, and C.J. Buchholz. 2008. Targeted cell entry of lentiviral vectors. *Mol Ther.* 16:1427-1436. doi:10.1038/mt.2008.128.
- Funke, S., I.C. Schneider, S. Glaser, M.D. Muhlebach, T. Moritz, R. Cattaneo, K. Cichutek, and C.J. Buchholz. 2009. Pseudotyping lentiviral vectors with the wild-type measles virus glycoproteins improves titer and selectivity. *Gene Ther.* 16:700-705. doi:10.1038/gt.2009.11.
- Garibaldi, A., F. Carranza, and K.J. Hertel. 2017. Isolation of newly transcribed RNA using the metabolic label 4-thiouridine. *Methods Mol Biol.* 1648:169-176. doi:10.1007/978-1-4939-7204-3\_13.
- Hellebrand, E., J. Mautner, G. Reisbach, F. Nimmerjahn, M. Hallek, R. Mocikat, and W. Hammerschmidt. 2006. Epstein-Barr virus vector-mediated gene transfer into human B cells: potential for antitumor vaccination. *Gene Ther.* 13:150-162. doi:10.1038/sj.gt.3302602.
- Hendel, A., R.O. Bak, J.T. Clark, A.B. Kennedy, D.E. Ryan, S. Roy, I. Steinfeld, B.D. Lunstad, R.J. Kaiser, A.B. Wilkens, R. Bacchetta, A. Tsalenko, D. Dellinger, L. Bruhn, and M.H. Porteus. 2015. Chemically modified guide RNAs enhance CRISPR-Cas genome editing in human primary cells. *Nat Biotechnol.* 33:985-989. doi:10.1038/nbt.3290.
- Hsu, P.D., E.S. Lander, and F. Zhang. 2014. Development and applications of CRISPR-Cas9 for genome engineering. *Cell.* 157:1262-1278. doi:10.1016/j.cell.2014.05.010.
- Hultquist, J.F., K. Schumann, J.M. Woo, L. Manganaro, M.J. McGregor, J. Doudna, V. Simon, N.J. Krogan, and A. Marson. 2016. A Cas9 ribonucleoprotein platform for functional genetic studies of HIV-host interactions in primary human T cells. *Cell Rep.* 17:1438-1452. doi:10.1016/j.celrep.2016.09.080.

- Hung, K.L., I. Meitlis, M. Hale, C.Y. Chen, S. Singh, S.W. Jackson, C.H. Miao, I.F. Khan, D.J. Rawlings, and R.G. James. 2018. Engineering protein-secreting plasma cells by homology-directed repair in primary human B cells. *Mol Ther.* 26:456-467. doi:10.1016/j.ymthe.2017.11.012.
- Itoua Maïga, R., J. Lemieux, A. Roy, C. Simard, and S. Néron. 2014. Flow cytometry assessment of in vitro generated CD138+ human plasma cells. *Biomed Res Int.* 2014:536482. doi:10.1155/2014/536482.
- Kempkes, B., D. Pich, R. Zeidler, and W. Hammerschmidt. 1995a. immortalization of human primary B lymphocytes in vitro with DNA. *Proc Natl Acad Sci U S A.* 92:5875-5879. doi:10.1073/pnas.92.13.5875.
- Kempkes, B., D. Pich, R. Zeidler, B. Sugden, and W. Hammerschmidt. 1995b. immortalization of human B lymphocytes by a plasmid containing 71 kilobase pairs of Epstein-Barr virus DNA. *J Virol.* 69:231-238
- Kim, D., B. Langmead, and S.L. Salzberg. 2015. HISAT: a fast spliced aligner with low memory requirements. *Nat Methods.* 12:357-360. doi:10.1038/nmeth.3317.
- Kim, S., D. Kim, S.W. Cho, J. Kim, and J.S. Kim. 2014. Highly efficient RNA-guided genome editing in human cells via delivery of purified Cas9 ribonucleoproteins. *Genome Res.* 24:1012-1019. doi:10.1101/gr.171322.113.
- Kolesnikov, N., E. Hastings, M. Keays, O. Melnichuk, Y.A. Tang, E. Williams, M. Dylag, N. Kurbatova, M. Brandizi, T. Burdett, K. Megy, E. Pilicheva, G. Rustici, A. Tikhonov, H. Parkinson, R. Petryszak, U. Sarkans, and A. Brazma. 2015. ArrayExpress update--simplifying data submissions. *Nucleic Acids Res.* 43:D1113-6. doi:10.1093/nar/gku1057.
- Li, H., B. Handsaker, A. Wysoker, T. Fennell, J. Ruan, N. Homer, G. Marth, G. Abecasis, R. Durbin, and G.P.D.P.S. 1000. 2009. The sequence alignment/map format and SAMtools. *Bioinformatics.* 25:2078-2079. doi:10.1093/bioinformatics/btp352.
- Maier, S., M. Santak, A. Mantik, K. Grabusic, E. Kremmer, W. Hammerschmidt, and B. Kempkes. 2005. A somatic knockout of CBF1 in a human B-cell line reveals that induction of CD21 and CCR7 by EBNA-2 is strictly CBF1 dependent and that downregulation of immunoglobulin M is partially CBF1 independent. *J Virol.* 79:8784-8792. doi:10.1128/JVI.79.14.8784-8792.2005.
- Mandal, P.K., L.M. Ferreira, R. Collins, T.B. Meissner, C.L. Boutwell, M. Friesen, V. Vrbanac, B.S. Garrison, A. Stortchevoj, D. Bryder, K. Musunuru, H. Brand, A.M. Tager, T.M. Allen, M.E. Talkowski, D.J. Rossi, and C.A. Cowan. 2014. Efficient ablation of genes in human hematopoietic stem and effector cells using CRISPR/Cas9. *Cell Stem Cell.* 15:643-652. doi:10.1016/j.stem.2014.10.004.
- Maruo, S., Y. Wu, S. Ishikawa, T. Kanda, D. Iwakiri, and K. Takada. 2006. Epstein-Barr virus nuclear protein EBNA3C is required for cell cycle progression and growth maintenance of lymphoblastoid cells. *Proc Natl Acad Sci U S A.* 103:19500-19505. doi:10.1073/pnas.0604919104.
- Matsuoka, Y., G.E. Moore, Y. Yagi, and D. Pressman. 1967. Production of free light chains of immunoglobulin by a hematopoietic cell line derived from a patient with multiple myeloma. *Proc Soc Exp Biol Med.* 125:1246-1250. doi:10.3181/00379727-125-32327.
- Mrozek-Gorska, P., A. Buschle, D. Pich, T. Schwarzmayr, R. Fechtner, A. Scialdone, and W. Hammerschmidt. 2019. Epstein-Barr virus reprograms human B lymphocytes immediately in the prelatent phase of infection. *Proc Natl Acad Sci U S A.* 116:16046-16055. doi:10.1073/pnas.1901314116.

- Neuhierl, B., R. Feederle, W. Hammerschmidt, and H.J. Delecluse. 2002. Glycoprotein gp110 of Epstein-Barr virus determines viral tropism and efficiency of infection. *Proc. Natl. Acad. Sci. U S A.* 99:15036-15041. doi:10.1073/pnas.232381299.
- Nutt, S.L., P.D. Hodgkin, D.M. Tarlinton, and L.M. Corcoran. 2015. The generation of antibody-secreting plasma cells. *Nat Rev Immunol.* 15:160-171. doi:10.1038/nri3795.
- Paíno, T., M.E. Sarasquete, B. Paiva, P. Krzeminski, L. San-Segundo, L.A. Corchete, A. Redondo, M. Garayoa, R. García-Sanz, N.C. Gutiérrez, E.M. Ocio, and J.F. San-Miguel. 2014. Phenotypic, genomic and functional characterization reveals no differences between CD138++ and CD138low subpopulations in multiple myeloma cell lines. *PLoS One.* 9:e92378. doi:10.1371/journal.pone.0092378.
- Pich, D., P. Mrozek-Gorska, M. Bouvet, A. Sugimoto, E. Akidil, A. Grundhoff, S. Hamperl, P.D. Ling, and W. Hammerschmidt. 2019. First days in the life of naive human B lymphocytes infected with Epstein-Barr virus. *MBio.* 10.1128/mBio.01723-19.
- Pulvertaft, J.V. 1964. Cytology of Burkitt's Tumour (African Lymphoma). *Lancet.* 1:238-240
- Quentmeier, H., C. Pommerenke, W.G. Dirks, S. Eberth, M. Koepfel, R.A.F. MacLeod, S. Nagel, K. Steube, C.C. Uphoff, and H.G. Drexler. 2019. The LL-100 panel: 100 cell lines for blood cancer studies. *Sci Rep.* 9:8218. doi:10.1038/s41598-019-44491-x.
- R Core Team 2018. R: A language and environment for statistical computing.
- Robillard, N., S. Wuillème, P. Moreau, and M.C. Béné. 2014. Immunophenotype of normal and myelomatous plasma-cell subsets. *Front Immunol.* 5:137. doi:10.3389/fimmu.2014.00137.
- Schmid-Burgk, J.L., T. Schmidt, M.M. Gaidt, K. Pelka, E. Latz, T.S. Ebert, and V. Hornung. 2014. OutKnocker: a web tool for rapid and simple genotyping of designer nuclease edited cell lines. *Genome Res.* 24:1719-1723. doi:10.1101/gr.176701.114.
- Schumann, K., S. Lin, E. Boyer, D.R. Simeonov, M. Subramaniam, R.E. Gate, G.E. Haliburton, C.J. Ye, J.A. Bluestone, J.A. Doudna, and A. Marson. 2015. Generation of knock-in primary human T cells using Cas9 ribonucleoproteins. *Proc Natl Acad Sci U S A.* 112:10437-10442. doi:10.1073/pnas.1512503112.
- Seki, A., and S. Rutz. 2018. Optimized RNP transfection for highly efficient CRISPR/Cas9-mediated gene knockout in primary T cells. *J Exp Med.* 215:985-997. doi:10.1084/jem.20171626.
- Skalska, L., R.E. White, M. Franz, M. Ruhmann, and M.J. Allday. 2010. Epigenetic repression of p16(INK4A) by latent Epstein-Barr virus requires the interaction of EBNA3A and EBNA3C with CtBP. *PLoS Pathog.* 6:e1000951. doi:10.1371/journal.ppat.1000951.
- Skalska, L., R.E. White, G.A. Parker, E. Turro, A.J. Sinclair, K. Paschos, and M.J. Allday. 2013. Induction of p16(INK4a) is the major barrier to proliferation when Epstein-Barr virus (EBV) transforms primary B cells into lymphoblastoid cell lines. *PLoS Pathog.* 9:e1003187. doi:10.1371/journal.ppat.1003187.
- Stadtmauer, E.A., J.A. Fraietta, M.M. Davis, A.D. Cohen, K.L. Weber, E. Lancaster, P.A. Mangan, I. Kulikovskaya, M. Gupta, F. Chen, L. Tian, V.E. Gonzalez, J. Xu, I.Y. Jung, J.J. Melenhorst, G. Plesa, J. Shea, T. Matlawski, A. Cervini, A.L. Gaymon, S. Desjardins, A. Lamontagne, J. Salas-McKee, A. Fesnak, D.L. Siegel, B.L. Levine, J.K. Jadowsky, R.M. Young, A. Chew, W.T. Hwang, E.O. Hexner, B.M. Carreno, C.L. Nobles, F.D. Bushman, K.R. Parker, Y. Qi, A.T. Satpathy, H.Y. Chang, Y. Zhao, S.F. Lacey, and C.H. June. 2020. CRISPR-engineered T cells in patients with refractory cancer. *Science.* 36710.1126/science.aba7365.

- Steinbrück, L., M. Gustems, S. Medele, T.F. Schulz, D. Lutter, and W. Hammerschmidt. 2015. K1 and K15 of Kaposi's sarcoma-associated herpesvirus are partial functional homologues of latent membrane protein 2A of Epstein-Barr virus. *J Virol.* 89:7248-7261. doi:10.1128/JVI.00839-15.
- Sternberg, S.H., S. Redding, M. Jinek, E.C. Greene, and J.A. Doudna. 2014. DNA interrogation by the CRISPR RNA-guided endonuclease Cas9. *Nature.* 507:62-67. doi:10.1038/nature13011.
- Styles, C.T., Q. Bazot, G.A. Parker, R.E. White, K. Paschos, and M.J. Allday. 2017. EBV epigenetically suppresses the B cell-to-plasma cell differentiation pathway while establishing long-term latency. *PLoS Biol.* 15:e2001992. doi:10.1371/journal.pbio.2001992.
- Styles, C.T., K. Paschos, R.E. White, and P.J. Farrell. 2018. The cooperative functions of the EBNA3 proteins are central to EBV persistence and latency. *Pathogens.* 710.3390/pathogens7010031.
- Wang, T., J.J. Wei, D.M. Sabatini, and E.S. Lander. 2014. Genetic screens in human cells using the CRISPR-Cas9 system. *Science.* 343:80-84. doi:10.1126/science.1246981.
- Wu, C.M., T.L. Roth, Y. Baglaenko, D.M. Ferri, P. Brauer, J.C. Zuniga-Pflucker, K.W. Rosbe, J.E. Wither, A. Marson, and C.D.C. Allen. 2018. Genetic engineering in primary human B cells with CRISPR-Cas9 ribonucleoproteins. *J Immunol Methods.* 457:33-40. doi:10.1016/j.jim.2018.03.009.

## Figure legends

### Fig. 1. Targeting the locus of the cell surface protein CD46 in primary human B cells.

**(A)** Schematic overview of the delivery of CD46-Cas9 RNP complexes to primary human B cells by nucleofection.  $2 \times 10^6$  primary human B cells were nucleofected with RNP complexes assembled with a two-component guide RNA (gRNA) protocol using tracrRNA, crRNA and recombinant *Streptococcus pyogenes* Cas9 nuclease. The cells recovered for 1 h after nucleofection before they were infected with wild-type (WT) EBV. The efficiency of gene editing was analyzed at the level of nucleotide sequence and surface protein. **(B)** Indel frequencies derived from next generation sequencing analysis of the second exon of the *CD46* gene are shown together with flow cytometry analysis of CD46 protein expression from all investigated samples. Cells were nucleofected with individual Cas9 RNP complexes (gRNA1 or 2) or concomitantly with both complexes and were analyzed 1 week later. Mean and standard deviation from four independent biological replicates are shown. **(C)** Flow cytometry analysis with FSC-A (y-axis) and APC-A levels (x-axis) documents an up to 97 % reduction of CD46 surface staining of living cells treated with two RNP complexes.

### Fig. 2. The kinetics of induced DNA breaks and their repair in the second exon of *CD46* in non-infected and EBV-infected primary human B cells.

**(A)** Primary human B cells were nucleofected with the two CD46-Cas9 RNP complexes and analyzed 16, 24, 48 and 72 hours later. The non-infected cells were purified at the indicated time points by Ficoll gradient centrifugation and part of the *CD46* locus in cellular DNA of viable cells was amplified in a two level PCR barcoding scheme prior to next generation sequencing. Data were analyzed using the Outknocker 2.0 web tool. The results showed a indel frequency of 70 % in primary human B cells 16 h after nucleofection in the absence of EBV infection. Indel frequencies increased up to 90 % 72 h after nucleofection. Mean and standard deviation of independent biological replicates are shown. **(B)** The time course experiments show the indel frequencies in the second exon of *CD46* in EBV infected primary B cells after nucleofection with two CD46-Cas9 RNP complexes. Cellular DNA of viable cells was amplified in a two level PCR barcoding scheme prior to next generation sequencing and the data were analyzed with the Outknocker 2.0 web tool. Indel frequencies increased up to 85 % 8 days after nucleofection. Mean and standard deviation of independent biological replicates are shown. **(C)** CD46 flow cytometry analyses of primary B cells after nucleofection with two CD46-Cas9 RNP complexes and subsequent infection with WT EBV are shown. Mean and standard deviation of independent biological replicates are provided. **(D)** Scheme of metabolic labeling of newly transcribed RNAs with 4sU and their analysis by next generation sequencing.  $2 \times 10^7$  primary human B cells were nucleofected with two CD46-Cas9 RNP complexes. Nucleofected (CD46-Cas9) as well as adjusted numbers of untreated (WT) B cell samples were infected with wild-type (WT) EBV. 23 hours after nucleofection, newly transcribed RNAs were metabolically labeled with 4sU for 1 hour. After RNA extraction, biotinylation of newly transcribed 4sU labeled RNAs and their enrichment, the libraries were sequenced on a NextSeq500 (Illumina) instrument with 2x150 bp paired end reads. 15.7 to 18.6 Mio reads per sample were obtained. **(E)** An MA plot shows the differentially expressed genes in CD46-Cas9 vs. WT B cell samples following EBV infection and 4sU labeling 24 hours after B cell preparation. Log<sub>2</sub>-fold changes and mean of normalized read counts were plotted on the y- and x-axes, respectively. 182 differentially expressed genes are designated by magenta dots. Green dots highlight the *CD46* gene and genes involved in the different

pathways of DNA repair. Ongoing transcription at the *CD46* locus was intact in CD46-Cas9 RNP complex nucleofected cells but reduced by a factor of 0.73 24 h after nucleofection. **(F)** Shown are three schematic examples of mapped reads aligned to the hg19 reference sequence together with the two RNP complex target sites (chr1: 207,930,419-207,930,438 and chr1: 207,930,497-207,930,516) at exon 2 of the *CD46* gene. Reads with unmodified exon 2 (WT) sequences, reads with nucleotide mutations (indels, i.e. base changes or small insertions and deletions), reads with deletions in between the two annotated RNP complex target sites and their percentages are shown.

**Fig. 3. p16<sup>INK4a</sup> is a functional barrier to EBV driven proliferation of lymphoblastoid cells.**

**(A)** Blueprint of the primary transcript and the spliced mRNA with the three exons of *CDKN2A* on chromosome 9 encoding the p16<sup>INK4a</sup> protein. The target site of the RNP complex within the 1st exon (exon1 $\alpha$ ) (chr9:21,974,678 -21,974,827) is shown. **(B)** Study of the biological effect of the *CDKN2A* knockout in a time course experiment. WT and p16 KO cells were mixed such that the fraction of the latter was in the order of 10 to 20 %, when the cells were infected with WT or  $\Delta$ EBNA3C EBV strains. The knockout status of the *CDKN2A* gene was analyzed by next generation sequencing analyzing the mixed cell populations over time. The fraction of cells with a disabled *CDKN2A* gene increased in cells infected with  $\Delta$ EBNA3C EBV exceeding 80 % after eight weeks, whereas the knockout status of *CDKN2A* in the population of cells infected with WT EBV did not show a clear trend. Results from two biological replicates are shown, additional replicates can be found in **Supplementary Figure S5A**. **(D)** Cell expansion of four different B cell populations were plotted as a function of days post nucleofection (x-axis) versus the format of the cell culture vessel (y-axis) starting with a single well in a 48-well cluster plate.  $2 \times 10^6$  B cells with an intact *CDKN2A* locus (WT cells) or cells with an edited *CDKN2A* gene (p16 KO cells) were infected with wild-type (WT) EBV (left panel) or  $\Delta$ EBNA3C EBV (right panel). WT EBV infected primary human B cells developed into stably expanding lymphoblastoid cell lines irrespective of their p16<sup>INK4a</sup> status (left panel).  $\Delta$ EBNA3C EBV infected B cells could be expanded until about six weeks p.i., when cells with an unmodified *CDKN2A* gene ceased to proliferate and were lost eventually (right panel). In contrast,  $\Delta$ EBNA3C mutant EBV infected p16<sup>INK4a</sup> negative B cells continued to proliferate beyond this time point. The results were consistent between four different biological replicates. Additional replicates are shown in **Supplementary Figure S5B**.

## Supplementary Figure legends

### Fig. S1. Molecular analysis of the *CD46* locus in CD46-Cas9 treated and non-treated B cells.

**(A)** Cellular DNAs were PCR amplified, sequenced and analyzed with the Outknocker webtool. The insertions and deletions in exon 2 of the *CD46* gene in WT EBV infected primary human B cells were analyzed 8 days post nucleofection. Reads from B cells nucleofected with the CD46-Cas9 RNP complexes (CD46-Cas9) were aligned to the hg19 reference human genome. The reads are summarized in pie charts and unique sequences are displayed below as examples. The target site of gRNA1, the upstream CD46 specific crRNA is highlighted in yellow within the reference sequence of the *CD46* locus; the PAM sequence is highlighted in orange. **(B)** Representative agarose gels of PCR products encompassing exon 2 of the *CD46* locus in non-infected and EBV-infected B cells after nucleofection with two CD46-Cas9 RNP complexes at indicated time point post nucleofection. The expected PCR product of the intact *CD46* locus is 276 bp in length. PCR products obtained from the template of the *CD46* locus with the partially deleted exon 2 are about 178 bp in length. Experiments shown in panel B are representative of three independent biological replicates from non-infected and EBV infected cells.

### Fig. S2. Read coverage at 4sU labeled *CD46* transcripts show a reduced transcription in cells 24 hours after CD46-Cas9 RNP complex nucleofection.

The upper plot shows the primary, unspliced transcript together with its nucleotide coordinates on chromosome 1 together with the 14 exons (dashed, vertical lines) of the transcript (x-axis). The normalized read coverage at single nucleotide resolution is shown (y-axis) for WT cells (blue line) and CD46-Cas9 treated cells (red line). The lower graph depicts the mRNA data of exon 1 to 8 of the *CD46* transcript of the two conditions. Read normalization of the three pairs of replicates was performed as stated in Materials and Methods.

### Fig. S3. RNA coverage of the *CD46* locus in CD46-Cas9 treated cells is reduced compared to exons of other transcripts of equal length (189 nt).

The plots show the primary transcript positions (bp) (x-axis) vs. the normalized read coverage at single nucleotide resolution along the exons of the transcripts (y-axis) for WT cells (blue line) and CD46-Cas9 nucleofected cells (red line). The upper plots visualize the differences in 189 nt long exons together with the second exon of the *CD46* transcript; the lower row of plots shows the last exons of the five selected mRNAs shown above. **(A)** The read coverage of the *CD46* transcript at exon 2 (chr1: 207,930,359-207,930,547) in non-treated (WT) and CD46-Cas9 nucleofected cells (CD46-Cas9) is shown. **(B-E)** Exons of identical length as exon 2 of the *CD46* transcript (189 nt, upper row) and terminal exons (lower row) of transcripts of *ATN1* (panel B), *RBM23* (panel C), *DICER* (panel D), *FCRL5* (panel E) are shown for comparison.

### Fig. S4. Next generation sequencing of the *CDKN2A* locus in p16 KO and WT cells.

Cellular DNA of the *CDKN2A* locus was PCR amplified, sequenced and analyzed with the Outknocker webtool. The insertions and deletions in exon 1 $\alpha$  of *CDKN2A* encoding p16<sup>INK4a</sup> were analyzed in primary human B cells two weeks post nucleofection. Reads for WT and p16 KO cells were aligned to the hg19 reference human sequence. The results are



summarized in pie charts and unique read sequences are displayed below as examples. The target site of the *CDKN2A* specific crRNA and the PAM sequence are highlighted in yellow and orange, respectively, in the reference sequence.

**Fig. S5. p16<sup>INK4a</sup> is the only functional barrier to EBV driven proliferation of lymphoblastoid cells.**

**(A)** To study the biological effect of the *CDKN2A* knockout in a time course analysis, we mixed p16 WT and p16 KO cells such that the fraction of the latter was in the order of 10 to 20 % prior to infection as described in Figure 3. The knockout status of the *CDKN2A* encoded p16<sup>INK4a</sup> protein was assessed by next generation sequencing in the two mixed cell populations infected with the wild-type (WT) EBV or  $\Delta$ EBNA3C EBV. The fraction of cells with a disabled *CDKN2A* gene increased in cells infected with  $\Delta$ EBNA3C EBV exceeding 80 % after eight weeks. In contrast the knockout status of *CDKN2A* was stable in the population of cells infected with WT EBV. Results of two biological replicates are shown. The phenotypic changes in WT and p16 KO cells were analyzed by flow cytometry. **(B)** Cell expansion of four different B cell populations were recorded and plotted as a function of days post nucleofection (x-axis) versus the format of the cell culture vessel (y-axis) starting with a single well in a 48-well cluster plate up to T175 cell culture flasks.  $2 \times 10^6$  B cells with an intact *CDKN2A* locus (p16 WT cells) or cells with an edited *CDKN2A* gene (p16 KO cells) were infected with the WT EBV (left panels) or  $\Delta$ EBNA3C EBV (right panels). The results were consistent between four additional biological replicates, one of which is shown in Figure 3C.

**Fig. S6. p16<sup>INK4a</sup> negative B cells infected with an EBNA3A/C double negative EBV do not differentiate into plasmablasts or plasma cells.**

**(A)** Schematic overview of the delivery of the *CDKN2A*-Cas9 RNP complex and infection of primary human B cells. The nucleofected cells (p16 KO cells) recovered for 1 h prior to their infection with  $\Delta$ EBNA3A/C EBV. In parallel, non-nucleofected control cells (WT cells) were infected with WT EBV. The efficiency of gene editing in p16 KO cells was confirmed by next generation sequencing of the *CDKN2A* locus. **(B)** p16 KO cells infected with  $\Delta$ EBNA3A/C EBV and WT cells infected with WT EBV were analyzed for CD20, CD38 and CD138 cell surface levels by flow cytometry. The graph summarizes the mean fluorescence intensities (MFI) of CD20, CD38 and CD138 markers of living cells two months post infection. Mean and standard deviation obtained from 8 independent biological replicates are shown. The significance of difference in the immunophenotypic surface pattern experiments was calculated using the Wilcoxon matched-pairs signed rank test. **(C)** The left and middle panels show forward and sideward scatter data of cells from an established EBV-infected lymphoblastoid cell line (LCL) and the RPMI-8226 cell line, respectively. Both cell lines were analyzed with a CD138 specific antibody (Invitrogen, APC-conjugated, #17-1389-42). RPMI-8226 cells (blue) express higher levels of CD138 than a standard LCL (red) in the graph on the right with normalized counts (y-axis). RPMI-8226 cells also reveal a subpopulation that exhibits a higher level of CD138 surface expression than the majority of the cells.

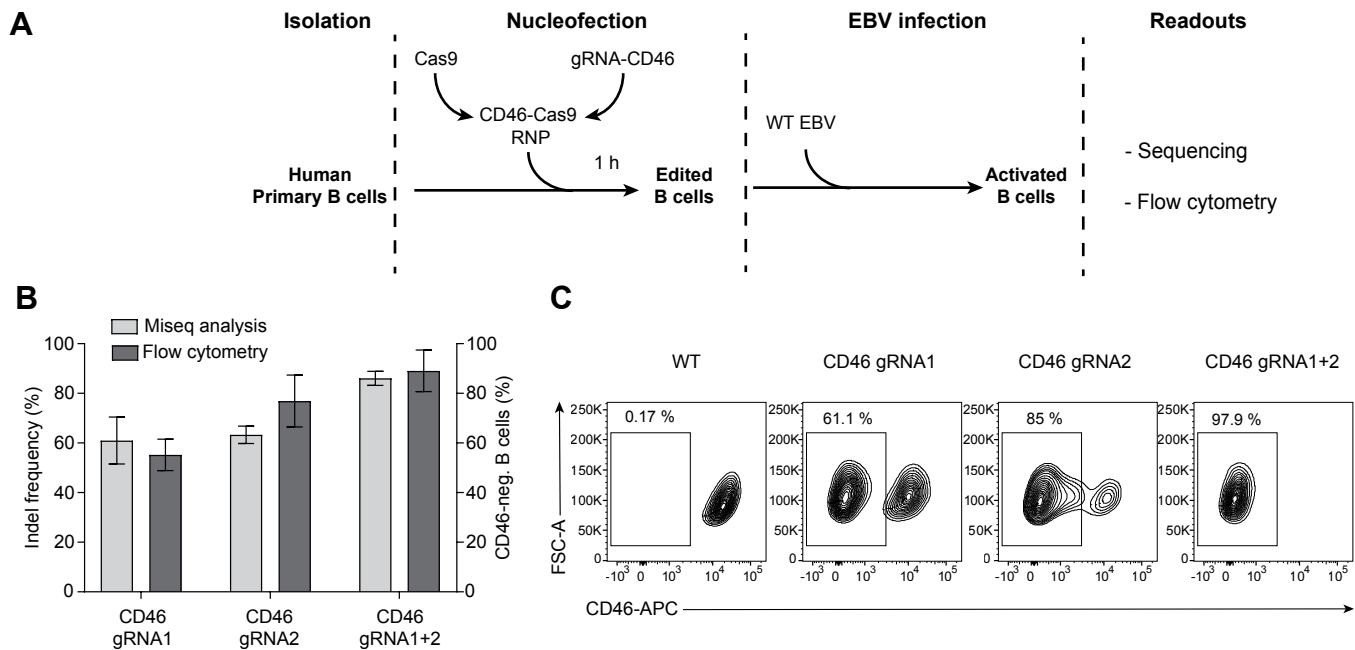

**Figure 1**

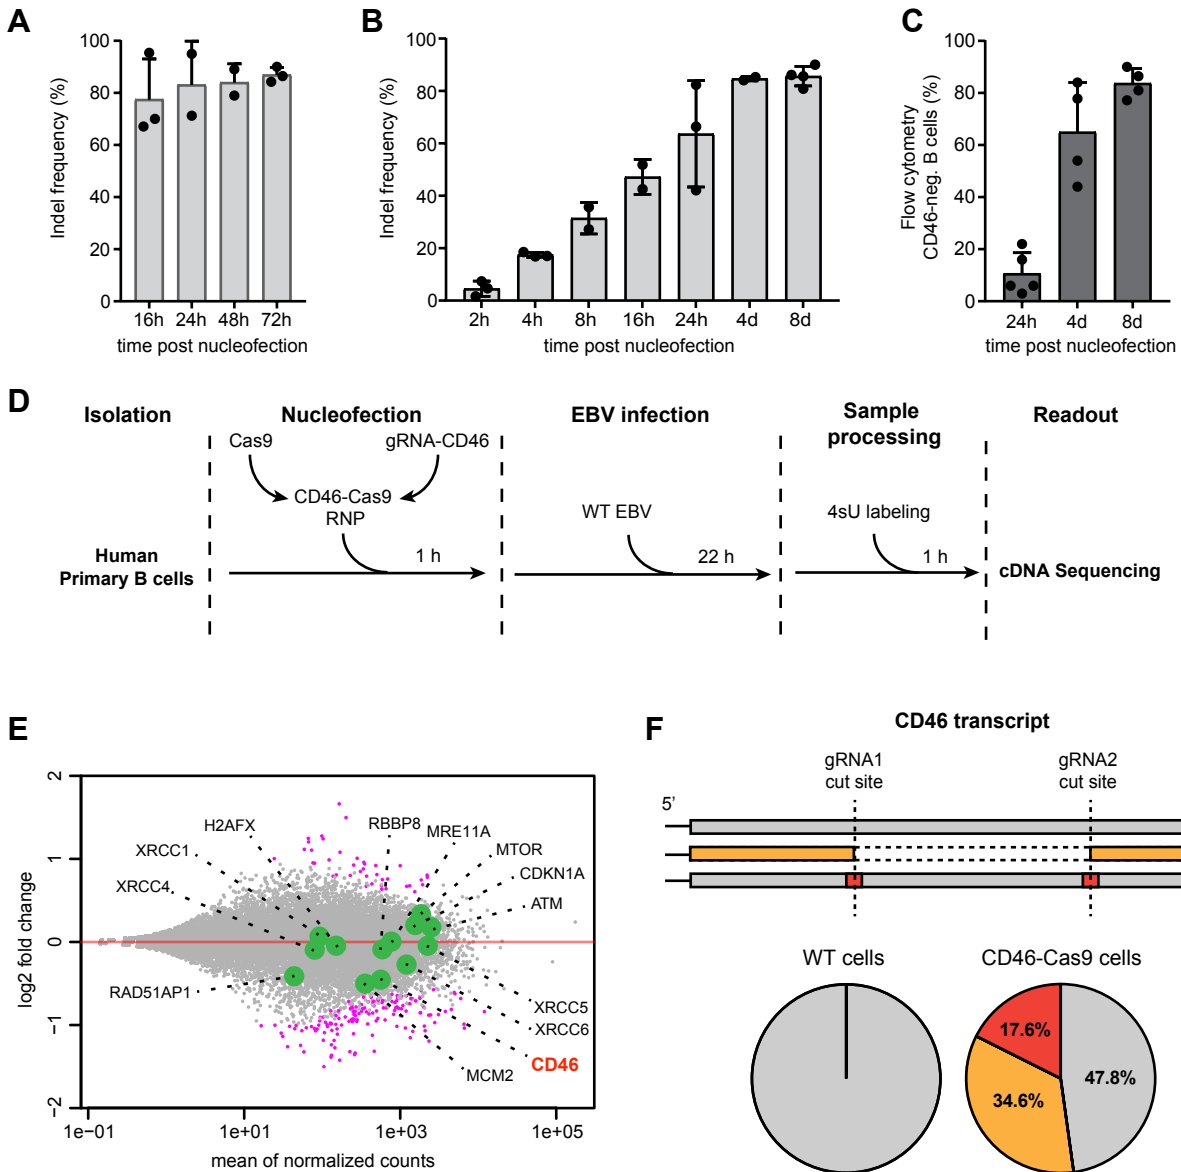

**Figure 2**

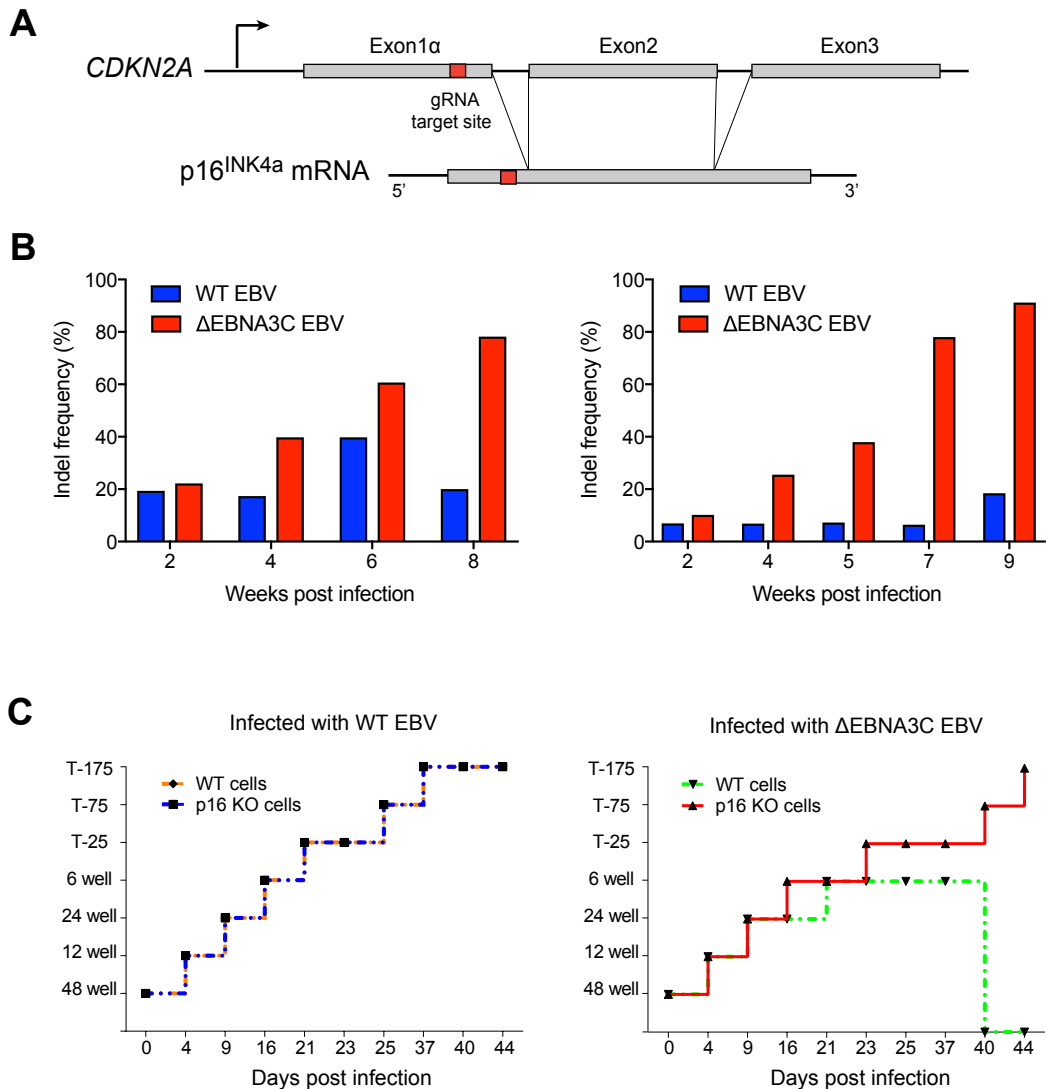

**Figure 3**
